# Supplementary material for: Tuning polysulfide adsorption and catalytic activity via surface functionalization of Nb 2 TiN 2 MXene in Na–S batteries
Source: Royal Society of Chemistry journal article supplement (doi:10.1039/d5nr03030g), 2025-01-01
Supplement: d5nr03030g1.pdf [file d5nr03030g1.pdf]

Supplementary document  
Of  
**Tuning Polysulfide Adsorption and Catalytic Activity via Surface Functionalization of Nb<sub>2</sub>TiN<sub>2</sub>  
MXene in Na–S Batteries**

Satheesh Mani<sup>a</sup>, Md Mahbubul Islam<sup>a,\*</sup>

<sup>a</sup> Department of Mechanical Engineering, Wayne State University, Detroit, Michigan 48202, USA

\*Corresponding Author: [gy5553@wayne.edu](mailto:gy5553@wayne.edu)

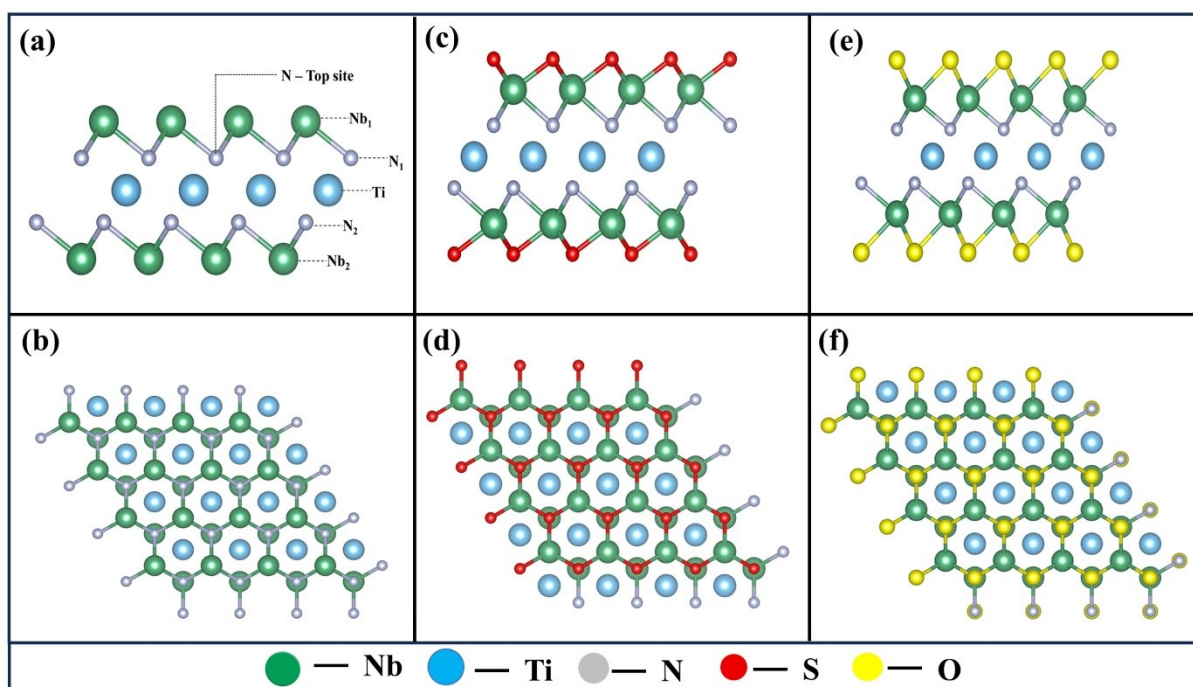

Figure S1: Optimized geometric configurations of Pristine and surface functionalized DTM-MXene. (a) side view of pristine  $\text{Nb}_2\text{TiN}_2$  showing N – Top site is a preferred termination site. (b) Top view of pristine  $\text{Nb}_2\text{TiN}_2$ . (c) and (d): Side and Top views of  $\text{Nb}_2\text{TiN}_2\text{O}_2$ , respectively. (e) and (f): Side and Top views of  $\text{Nb}_2\text{TiN}_2\text{S}_2$ , respectively.

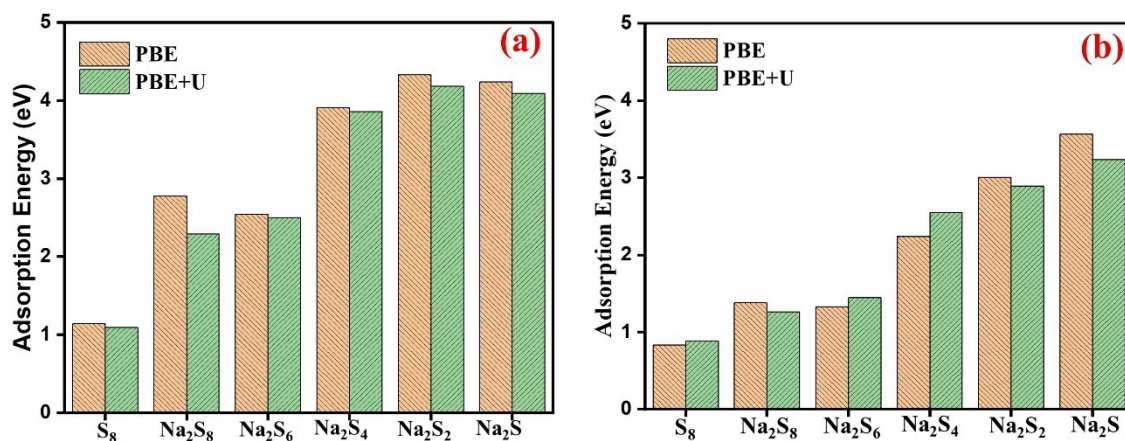

Figure S2: The adsorption energies of  $S_8$  and  $Na_2S_n$  ( $n = 2,4,6,8$ ) adsorbed on (a).  $Nb_2TiN_2O_2$  (b).  $Nb_2TiN_2S_2$  are calculated by employing the PBE and PBE+U methods, respectively.

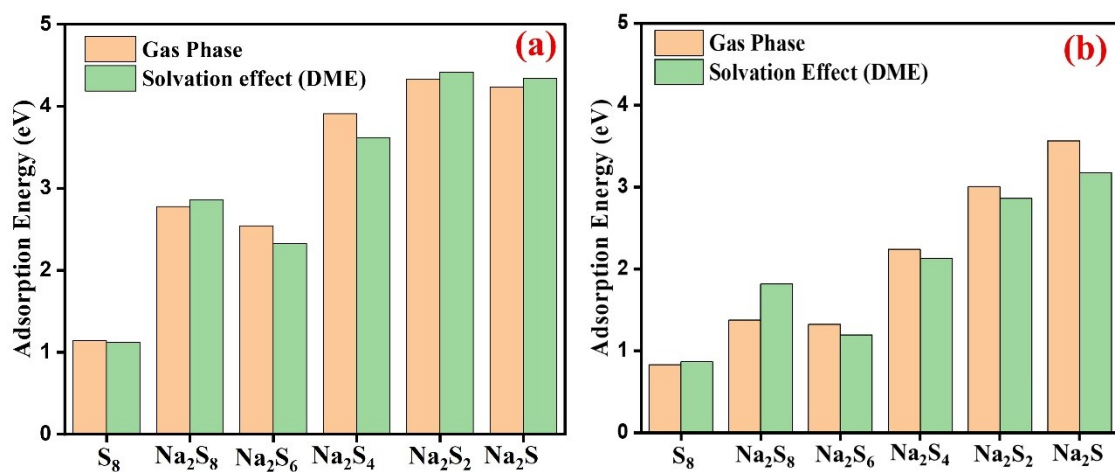

Figure S3. The adsorption energies of  $S_8$  and  $Na_2S_n$  ( $n = 2,4,6,8$ ) adsorbed on (a).  $Nb_2TiN_2O_2$  (b).  $Nb_2TiN_2S_2$  are calculated by employing gas phase and implicit solvation model, respectively.
